## 1 Title

# 2 On the Spread of Coronavirus Infection. A Mechanistic Model to Rate 3 Strategies for Disease Management

## 4 Authors

5 Shiyang Wang<sup>1</sup> and Doraiswami Ramkrishna<sup>1\*</sup>

## 6 Affiliations

7 <sup>1</sup>Davidson School of Chemical Engineering, Purdue University, West Lafayette Indiana,  
8 47907, USA

9 \*To whom correspondence should be addressed; E-mail: ramkrish@purdue.edu.

## 10 Abstract

11 Effective policy making based on ongoing COVID-19 pandemic is an urgent issue. We  
12 present a mathematical model describing the viral infection dynamics, which reveals two  
13 transmissibility parameters influenced by the management strategies in the area for control  
14 of the current pandemic. The parameters readily yield the peak infection rate and means for  
15 flattening the curve. Model parameters are shown to be correlated to different management  
16 strategies by employing machine learning, enabling comparison of different strategies and  
17 suggesting timely alterations. Treatment of population data with the model shows that  
18 restricted non-essential business closure, school closing and strictures on mass gathering  
19 influence the spread of infection. While a rational strategy for initiation of an economic  
20 reboot would call for a wider perspective of the local economics, the model can speculate  
21 on its timing based on the status of the infection as reflected by its potential for an  
22 unacceptably renewed viral onslaught.

## 23 Introduction

24 The pandemic of coronavirus (SARS-COV-2) infection has gripped the world with  
25 unparalleled anxiety. An alarming number of deaths have occurred within the short span of  
26 a little over four months! In US, more than one hundred thousand have died at the time of  
27 compiling this article with prospects of many more in the horizon. Despite the epidemic  
28 slowing, it appears to be abating at an unacceptable rate. There has been a scramble for  
29 controlling the spread of infection by people of various backgrounds including medical  
30 professionals, scientists, engineers, economists, the media, and political leaders. Although  
31 considerable insight has accumulated over efficient ways to confront this cataclysm (1, 2),  
32 much more remains to be learned about the disease transmission, its treatment, and  
33 prevention by a suitable vaccine for the future. While the government has taken actions to  
34 relieve the economic burden of coronavirus on certain industries, businesses, and American  
35 workers (e.g., paycheck protection program), the looming prospects of an economic  
36 breakdown of catastrophic proportions are a further complication that must also somehow  
37 influence the mode of confrontation of the pandemic.

45 An essential prerequisite to facing the coronavirus pandemic is understanding of the  
46 various factors that have a potential contribution to limiting the spread. The spread of  
47 infection occurs in multifarious ways. Thus one that is cited the most frequently is spread  
48 of the virus through droplets from coughing and sneezing (3). Another is from unwitting  
49 contact with infected surfaces (4) such as glassware, boxes and so on. Intimate contact  
50 through handshakes and hugs are even more efficient ways to transmit infection. Each  
51 occurs through different scenarios that must be envisaged with their respective frequencies  
52 of occurrence for a model formulation. For symptomatic disease associated with a pathogen  
53 transmissibility (marked by a basic reproduction number), different transmission routes are  
54 aligned to their implications for prevention; specifically, there may be four categories:  
55 symptomatic transmission, pre-symptomatic transmission, asymptomatic transmission, and  
56 environmental transmission. Given recent evidence of SARS-CoV-2 transmission by mildly  
57 symptomatic and asymptomatic persons (5), its incubation period is about 5.1 days and  
58 about 12 days of infection from exposure to symptom development (latent period).  
59 Therefore, unusually long term of latency period and pre-symptomatic transmission could  
60 have important implications for transmission dynamics (6).

61 Analysis of data accumulated from numerous sources have provided the general  
62 features of the spread in terms of when to expect the peak infection rate and what it takes to  
63 flatten this curve. Yet this understanding must be said to be qualitative without notable  
64 predictive features. A mathematical model is presented here of the spread of coronavirus  
65 (COVID-19) in terms of three parameters that control the rate of its spreading and flattening  
66 the infection rate curve when intervention by a vaccine is not available. Our model is  
67 concerned with a specific geographic domain of the United States with a given population  
68 of specified density (number per unit area) of which a fraction is initially infected. The  
69 infected population contributes virus within the domain which, for the present, is completely  
70 isolated from other domains. The spread of infection within the domain depends on the  
71 uninfected population and occurs at a rate governed by the extent of protective measures  
72 adopted to avoid infection from those infected. This spread obviously depends also on the  
73 viral population in the domain which grows by contribution from the infected (exhaled  
74 droplets, aerosol, contaminated surfaces, and possibly fecal-oral contamination (7)) and  
75 disappears by death/isolation/herd immunity etc. We should note that while there are  
76 numerous reports on reinfection of COVID-19 (8), majority of recovered patients retain  
77 certain immunity against the virus.

78 Our goal here is to find a suitably simple framework to produce a mathematical  
79 model that contains a limited number of parameters which can be readily identified from  
80 gross observations. Furthermore, they should relate in some way to various strategies that  
81 may be envisaged to control the spread of infection. To simulate both dynamics of viral and  
82 infected population, the modeling of the system in a considered geometric domain can be  
83 abstracted as its dimensionless form

$$\frac{dx}{d\tau} = (1-x)y - \gamma x, \tag{1}$$

$$\frac{dy}{d\tau} = \alpha x - \beta y, \tag{2}$$

85  
86 where  $x = n / N_o$  is the infected population density ( $n$ ) normalized by the population density  
87 in the domain ( $N_o$ ),  $y = V / V_o$  is the dimensionless viral population density,  $\tau = t / T_{inf}$  is the  
88 time scaled by the average time for an individual to be infected ( $T_{inf}$ ); The explanations of  
89 both dynamic equations are elaborated in supplementary material. Three dimensionless  
90 parameters (see physical interpretation of  $\alpha, \beta, \gamma$  in Table 1) presented in above  
91 differential equations compare the rates of different processes and have the capacity to  
92 control the spread of infection. Daily infection data must be fitted to the model by  
93 appropriate choice for the values of the dimensionless parameters (see the model fitting in  
94 Fig. S1 in supplementary material). The socio-economic behavior has diversified the  
95 dynamics of the infection curve; Furthermore, major regulatory governmental strictures  
96 may enforce more discipline in public behavior thus seriously affecting the parameters. This  
97 effect, it must be conceded, is buried in subtle empiricism of the model that we must seek  
98 to unearth. In doing so, we emulate the currently popular practice of machine learning  
99 towards estimating the parameters in each domain to assess the local government policy. In  
100 this regard, the informative results delivered by combining both approaches (i.e.  
101 mechanistic model and machine learning) could promote effective policy implementations  
102 against the transmission of disease (Fig. 1(A)). In Fig. 1(B), the national scale social  
103 distancing is undertaken with the administration guideline “15 Days to Slow the Spread”  
104 that divides the pre-guideline enforcement period (P1) and the post-guideline enforcement  
105 period (P2). Furthermore, to consider the heterogeneity of the population density, we model  
106 the infection dynamics in the leading county of every state (50 states plus Washington D.C.)  
107 Within different periods and regions, their parameter values will reflect the quality of  
108 management of the spread of infection in the area under consideration. The different  
109 mechanisms of transmission of infection may operate to varying extents in different areas  
110 depending on how the infection is managed locally. Thus one must regard the model as only  
111 “broadly” mechanistic and the relationship of model parameters to different strategies  
112 would be somewhat diffuse. Therefore, in connecting the model to guide strategies we resort  
113 to a statistical methodology based on machine learning tools, which could overcome the  
114 limitation just mentioned.

## 115 Results

### 116 117 **Role of Parameters in Spread of Infection.**

119 We first examine role of model parameters in the spread of infection. The P1 duration  
120 reveals the period of pathogen transmission with limited prevention in the United States.  
121 The early state of virus transmissibility can be characterized by ‘R-naught’ ( $R_0$ ), which is  
122 the basic reproduction number. Our estimate of  $R_0$  is about 2.8 (the median from data is  
123 2.75; our model is 2.90) whose transmission is stronger than influenza ( $R_0$ :1.4-1.6) (9) and  
124 weaker than Measles ( $R_0$ :12-18) (10). The speed of infection of an individual would depend  
125 on the value of  $T_{inf}$ : a large  $T_{inf}$  would imply a longer real time and thus a slower rise in  
126 infection. For instance, in New York at P1 period without government policy intervention,  
127 it typically takes about  $T_{inf} \approx 10$  minutes to infect an individual. With the implementation of  
128 government policy about social distancing, in P2 period,  $T_{inf}$  increases 25 times, and the  
129 approximation of an individual infection takes about 4 hours! To measure parameters ( $\alpha$ ,  
130  $\beta$ ,  $\gamma$ ), it is purposeful to examine the steady state solutions of the model represented by  
131 Eqs. (1) and (2). We show that the only relevant solution is  $\tilde{x} = 1 - \gamma(\alpha/\beta)^{-1}$  and  
132  $\tilde{y} = \alpha/\beta - \gamma$  where the projected total infected population ( $\tilde{x}$ ) and viral population ( $\tilde{y}$ ) are  
133 determined by  $\alpha/\beta$  and  $\gamma$ . Parameter  $\alpha/\beta$  represents the ratio of viral growth rate to its  
134 death rate, which represents the extent of environmental virulence. Fig. 1(C) shows that  
135 severe virulence environment (large  $\alpha/\beta$ ) are associated with the large counties (i.e. Los  
136 Angeles-CA (P1,P2), New York City-NY(P1,P2)). In particular, Wayne county at Michigan  
137 State shows significant improvement (severe  $\rightarrow$  moderate) as the proper social distancing is  
138 taken and thereby there would be a significant reduction of the virus in circulation. In  
139 general, counties with populous majority remain as small virulence during the entire period  
140 (Fig. 1(C)). Parameter  $\gamma$  represents the removal rate of infected patients (by  
141 recovery/death). Our model implies that  $\gamma$  is associated with  $\alpha/\beta$  positively: despite the  
142 infection, its percentage in each county remains low (e.g. the percentage of infection at New  
143 York City is about  $O(10^{-2})$ ); Therefore,  $\gamma(\alpha/\beta)^{-1} \sim 1$  and always  $\gamma < (\alpha/\beta)$ . Here, we  
144 ought to demonstrate two significant points: (1) mathematically,  $\gamma < (\alpha/\beta)$  is the necessary  
145 and sufficient condition for the stability of the solution; (2) as the difference between  $\gamma$  and  
146  $\alpha/\beta$  becomes smaller, the eventual infected population is smaller. The most direct way of  
147 containing infection depends on the availability of effective vaccines and therapies that can  
148 raise the value of  $\gamma$ . However, we should note that, without further modification, the current  
149 model would not directly account for the possibility of using experimental prescriptions  
150 such as Remdesivir recently authorized by Food and Drug Administration (FDA) (11).

### 151 **Indicators of COVID-19 Transmissibility: $\alpha/\beta$ & $\tilde{x}$**

152 Based on our model, we propose two indicators  $\alpha/\beta$  and  $\tilde{x}$  to characterize the infection  
153 dynamics. Reducing  $\alpha/\beta$  is accomplished by slowing the viral transfer from the infected

154 to the uninfected which can be accomplished by several ways such as social distancing  
155 (individual precautions can be washing, wearing masks, physical distancing 6 or 12 feet,  
156 and so on). In Fig. 2(A), we find that  $\alpha / \beta$  is strongly correlated with the county population  
157 ( $R=0.91$ ,  $p=2.1e-6$ ;  $p<0.05$  considered as significant), which is consistent with the physical  
158 explanation of  $(\alpha / \beta) \propto (N_o / V_o)$  in Table 1; given any domain,  $(N_o / V_o)$  increases with  
159 large population number but independent of population density  $N_o$ . On the other hand, the  
160 projected total infection fraction  $\tilde{x}$ , which characterizes the pathogen transmissibility, is  
161 positively correlated with the county population density ( $R=0.61$ ,  $p=0.016$  in Fig. 2(B))  
162 because of  $N_o$ ; the transmission of the infection becomes faster when the population density  
163 is high. Other factors such as weather (temperature, humidity) remain insignificant (weak  
164 correlation) to the infection dynamics (see supplementary material; also (12)). Fig. 2(C)  
165 exhibits how parameters  $\alpha / \beta$  and  $\tilde{x}$  affect the peak infection rate. The peak infection rate  
166 represents the stage beyond which the infection rate will drop. It is now possible to address  
167 the much debated strategy of “flattening the curve” by lowering peak infection rate. To  
168 reduce the transmissibility (i.e. lower  $\tilde{x}$ ), the peak infection rate has to be small (see Fig.  
169 2(C)). Our model recommends that this is accomplished when  $\alpha / \beta$  is low, suggesting the  
170 reduction of virus circulation (Fig. 2(D)).

### 171 172 **Impact of Lockdown: New York City**

173 We now proceed to model the effect of lockdown on COVID-19 transmissibility in New  
174 York City, as an example. Additionally, considering recently published policy of “Opening  
175 Up America Again” by the white house administration, we will study the effect of reopening  
176 economy on the dynamics of transmissibility in the New York metropolitan area. Here, we  
177 consider the influence of lockdown policy at New York City, where the isolation is  
178 determined by the geographic constraint of five boroughs (the Bronx, Brooklyn, Manhattan,  
179 Queens, and Staten Island) within the New York City (Fig. 3(A)). From Fig. 3(B), our model  
180 suggests that the mitigation brought about by lockdown is sensitive to the moment of  
181 implementation; an early enforcement of lockdown could delay its occurrence. Our study  
182 also shows that if the implementation happens after the peak infection, the strategy of  
183 slowing works less efficiently. However, the lockdown likely results in a long-term  
184 dynamics and the associated economic damage has to be considered as well.

### 185 186 **Reopening Economy on Second Wave: New York Metro Area**

187 During this pandemic, the financial center of the world--New York City area has been hit  
188 by massive layoffs and anticipates looming recession (13). This situation, spells some  
189 urgency for reopening the economy and resuming normal daily activity. However, we stress  
190 that opening the economy has to be cautious to the possible appearance of a second wave  
191 thus making the timing of the reopening very important. To simulate the impact of normal

192 daily activity on the current dynamics of infection, we study the transmissibility in both  
193 New York City and Bergen County (Inner New Jersey) within the metropolitan area. These  
194 two regions represent the most active interactions in the United States (leading out-  
195 computing in the metro area, NYC Planning 2018) and yet both have the leading  
196 coronavirus infections in their states. In the model, we relax the current government  
197 restraints and resume normal daily operations and activities, which allows the model to  
198 consider the worst scenario of the infection curve. Fig. 3(C) show that the economy  
199 reopening (with the least precaution) inevitably brings the second wave and thereof more  
200 mortality. However, the extent of infection outbreak can be drastically reduced by delaying  
201 the opening date (35% increase at 5.5th week vs. 4% increase at 7.5th week). We note that  
202 an effective policy intervention may reduce the drastic increment of the infected population.  
203 In the next section, we discuss how to quantify the effectiveness of current implemented  
204 policy on coronavirus transmissibility.

### 205 206 **Influence of Policy Measures in States**

207 With the U.S. administration declaring the social distancing guideline since March 16th,  
208 local governments have implemented more than 300 executive orders in fifty states, Puerto  
209 Rico, the District of Columbia, Guam, and the Virgin Islands. The executive actions and  
210 policies are related to declarations of states of emergency, school/business closure,  
211 prohibition of mass gathering, stay at home order, etc. Central issues stand as the  
212 effectiveness of ongoing individual policy is unclear. In our study, while the coronavirus  
213 transmissibility is strongly influenced by the local population dynamics (Figs. 2(A, B)), the  
214 statistical inference suggests the relevance of several ongoing policies on the coronavirus  
215 transmission (Fig. 4(A)). With our model empowered by machine learning tools, we  
216 perform the regression of both parameters  $\alpha / \beta$  and  $\tilde{x}$  based on all policy influences. By  
217 examining the weight associated with each policy measure and its significance (p-value) in  
218 Fig. 4(B-1), we should conclude that factors such as non-essential business closure,  
219 gathering ban and school closure possess strong impact on  $\tilde{x}$  (adjusted-R<sup>2</sup>=0.59, p=2e-6),  
220 which represents the total infected population. Both gathering ban and school closure  
221 emphasize the activity of population in young age, which is consistent with the recent  
222 finding that young people play a vital role in spread of COVID-19 (14,15). For virulence  
223 environment ( $\alpha / \beta$ ), while the severity of coronavirus spread is largely determined by the  
224 local population number, nonessential business closure plays a role in its attenuation effort  
225 among other considered policies (adjusted-R<sup>2</sup>=0.30, p=1e-3; see Fig. 4(B-2)). With the  
226 context of reopening the economy (since May 1st 2020), there are several reports on the  
227 surge of coronavirus infection in multiple states and most contagious region remains at the  
228 leading counties. Policies on both certain non-essential business limitation and gathering  
229 ban have been revised in almost all states (note: schools remain closed across the United  
230 States). Our model enables to incorporate these policy changes to predict and diagnose many  
231 states having surges of positive cases (Fig. 4(C)). By predicting the increase of  $\alpha / \beta$  and  
232  $\tilde{x}$  using machine learning, we find that the strong surges (marked as ‘severe’ in Fig. 4(C))

233 in states like Utah, Nebraska, Ohio, Kentucky, Texas and Virginia could stem from the  
234 relaxation of the gathering ban; Nevada, North Carolina, South Carolina and Mississippi  
235 have observed high daily positive cases, which is interpreted by our model as due to the  
236 non-essential businesses; We also find that several states (e.g. California, Wisconsin,  
237 Arizona, Alaska, Tennessee, Maine, etc.) have strong infection due to both factors (non-  
238 essential business closure and gathering ban). Our model captures all currently emerging  
239 states, indicating significant impact of government policy on the spread of coronavirus when  
240 a vaccine is unavailable. In Fig. 4(C), several states (marked as ‘moderate’) should be  
241 cautiously optimistic when relaxing social distancing measures despite downward trending  
242 of daily positive number because we observe increases in either  $\alpha / \beta$  (elevated virulence)  
243 or  $\tilde{x}$  (increased projected total infection number) in our model. In particular, the state of  
244 Massachusetts should retain strong measures (increments in both  $\alpha / \beta$  and  $\tilde{x}$ ).

## 246 Discussion

247  
248 In this report, we have proposed a new mechanistic model describing the transmission of  
249 COVID-19 in the United States. Our model is established in conjunction with administration  
250 policy, from which we propose two significant parameters. The parameter  $\alpha / \beta$  quantifies  
251 the severity of the coronavirus circulation, and the parameter  $\tilde{x}$  represents the projected  
252 total infected fraction. To be consistent with CDC county-by-county guideline, we studied  
253 the infection dynamics of the leading county in each state. Our study shows that New York  
254 City in New York, Los Angeles county in California, and Wayne county in Michigan exhibit  
255 strong coronavirus circulation. By examining the peak infection rate, our suggested strategy  
256 of ‘flattening the curve’ has to deal with lowering  $\alpha / \beta$ , towards drastically diminishing  
257 the virus population in the environment. Our study of lockdown suggests that it be  
258 implemented *before* the peak infection rate, since its arrival can be sensed well by the  
259 parameters. We have quantified the impact of current social distancing policies with  $\alpha / \beta$   
260 and  $\tilde{x}$ , suggesting that polices such as, restrictive non-essential business closure, a ban on  
261 gathering, and that of school closure are critical. This may strongly associate with the  
262 restricted activity of young people (young adults and teenagers). The novelty of this  
263 contribution is derived from two specific features. One locates each geographic region in  
264 our parameter space at any stage providing for a diagnosis of the disease status in the region,  
265 and the prevailing quality of its management. The other affords a direction in which changes  
266 in strategy must be brought about for controlling the disease. Although a rational analysis  
267 for an economic reboot should be based on a considerably expanded view of the local  
268 economics, it is possible to derive some useful guidelines from our model study. To this  
269 extent, we conclude, perhaps somewhat speculatively, that our suggestion for an economic  
270 reopening may be viable if non-essential business closure is conditional, mass gathering is  
271 limited and school opening is delayed. At any rate, in the absence of such restrictive  
272 measures, the prospect of an economic recovery is less likely.

## 273 References and Notes

- 274 1. M. Chinazzi, J. T. Davis, M. Ajelli, C. Gioannini, M. Litvinova, S. Merler, A. P. Piontti, K.  
275 Mu, L. Rossi, K. Sun, C. Viboud, X. Xiong, H. Yu, M. E. Halloran, I. M. Longini Jr., A.  
276 Vespignani, The effect of travel restrictions on the spread of the 2019 novel coronavirus  
277 (covid-19) outbreak. *Science* **368**, 395 (2020).
- 278 2. L. Ferretti, C. Wymant, M. Kendall, L. Zhao, A. Nurtay, L. Abeler-Dörner, M.  
279 Parker, D. Bonsall, C. Fraser, Quantifying sars-cov-2 transmission suggests epidemic  
280 control with digital contact tracing. *Science* **368**, 6491 (2020).
- 281 3. L. Bourouiba, Turbulent gas clouds and respiratory pathogen emissions: potential  
282 implications for reducing transmission of covid-19. *Jama* (2020).
- 283 4. Z.-D. Guo, Z.-Y. Wang, S.-F. Zhang, X. Li, L. Li, C. Li, Y. Cui, R.-B. Fu, Y.-Z. Dong,  
284 X.-Y. Chi, M.-Y. Zhang, K. Liu, C. Cao, B. Liu, K. Zhang, Y.-W. Gao, B. Lu, W. Chen,  
285 Aerosol and surface distribution of severe acute respiratory syndrome coronavirus2 in  
286 hospital wards, Wuhan, China, 2020. *Emerg. Infect. Dis.* **26**, 7(2020).
- 287 5. S. A. Lauer, K. H. Grantz, Q. Bi, F. K. Jones, Q. Zheng, H. R. Meredith, A. S.  
288 Azman, N. G. Reich, J. Lessler, The incubation period of coronavirus disease 2019 (covid-  
289 19) from publicly reported confirmed cases: estimation and application. *Ann. Intern. Med.*  
290 **172**(9), 577-582 (2020).
- 291 6. M. Lipsitch, T. Cohen, B. Cooper, J. M. Robins, S. Ma, L. James, G. Gopalakrishna, S.  
292 K. Chew, C. C. Tan, M. H. Samore, D. Fisman, M. Murray, Transmission dynamics and  
293 control of severe acute respiratory syndrome. *Science* **300**, 1966 (2003).
- 294 7. A. Repici, R. Maselli, M. Colombo, R. Gabbiadini, M. Spadaccini, A. Anderloni, S.  
295 Carrara, A. Fugazza, M. Di Leo, P. A. Galtieri, G. Pellegatta, E. C. Ferrara, E. Azzolini, M.  
296 Lagioia, Coronavirus (covid-19) outbreak: what the department of endoscopy should know.  
297 *Gastrointest. Endosc.* (2020).
- 298 8. L. Lan, D. Xu, G. Ye, C. Xia, S. Wang, Y. Li, and H. Xu, Positive rt-pcr test results  
299 inpatients recovered from covid-19. *Jama* **323**, 1502 (2020).
- 300 9. C. Fraser, C. A. Donnelly, S. Cauchemez, W. P. Hanage, M. D. Van Kerkhove, T. D.  
301 Hollingsworth, J. Griffin, R. F. Baggaley, H. E. Jenkins, E. J. Lyons, T. Jombart, W. R.  
302 Hinsley, N. C. Grassly, F. Balloux, A. C. Ghani, N. M. Ferguson, A. Rambaut, O. G. Pybus,  
303 H. Lopez-Gatell, C. M. Alpuche-Aranda, I. Bojorquez Chapela, E. Palacios Zavala, D. Ma.  
304 Espejo Guevara, F. Checchi, E. Garcia, S. Hugonnet, C. Roth, The WHO Rapid Pandemic  
305 Assessment Collaboration, Pandemic potential of a strain of influenza a (h1n1): early  
306 findings. *Science* **324**, 1557 (2009).
- 307 10. F. M. Guerra, S. Bolotin, G. Lim, J. Heffernan, S. L. Deeks, Y. Li, and N. S.  
308 Crowcroft, The basic reproduction number ( $r_0$ ) of measles: a systematic review. *Lancet*  
309 *Infect. Dis.* **17**, e420 (2017).
- 310 11. J. Grein, N. Ohmagari, D. Shin, G. Diaz, E. Asperges, A. Castagna, T. Feldt, G. Green,  
311 M. L. Green, F. X. Lescure, E. Nicastri, R. Oda, K. Yo, E. Quiros-Roldan, A. Studemeister,  
312 J. Redinski, S. Ahmed, J. Bennett, D. Chelliah, D. Chen, S. Chihara, S. H. Cohen, J.  
313 Cunningham, A. D'Arminio Monforte, S. Ismail, H. Kato, G. Lapadula, E. L'Her, T.  
314 Maeno, S. Majumder, M. Massari, M. Mora-Rillo, Y. Mutoh, D. Nguyen, E. Verweij, A.  
315 Zoufaly, A. O. Osinusi, A. DeZure, Y. Zhao, L. Zhong, A. Chokkalingam, E. Elboudwarej,  
316 L. Telep, L. Timbs, I. Henne, S. Sellers, H. Cao, S. K. Tan, L. Winterbourne, P. Desai, R.



- 317 Mera, A. Gaggar, R. P. Myers, D. M. Brainard, R. Childs, T. Flanigan, Compassionate use  
318 of remdesivir for patients with severe covid-19. *N. Engl. J. Med.* (2020).
- 319 12. R. E. Baker, W. Yang, G. A. Vecchi, C. J. E. Metcalf, and B. T. Grenfell, Susceptible  
320 supply limits the role of climate in the early sars-cov-2 pandemic. *Science* (2020).
- 321 13. M. S. Eichenbaum, S. Rebelo, and M. Trabandt, The macroeconomics of epidemics.  
322 *Tech. Rep.* (National Bureau of Economic Research, 2020).
- 323 14. S. Tian, N. Hu, J. Lou, K. Chen, X. Kang, Z. Xiang, H. Chen, D. Wang, N. Liu, D. Liu,  
324 G. Chen, Y. Zhang, D. Li, J. Li, H. Lian, S. Niu, L. Zhang, J. Zhang, Characteristics of  
325 covid-19 infection in Beijing. *J. Infect.* (2020).
- 326 15. M. Day, Covid-19: identifying and isolating asymptomatic people helped eliminate  
327 virus in Italian village. *BMJ* **368**, m1165 (2020).
- 328 16. Z. Du, X. Xu, Y. Wu, L. Wang, B. J. Cowling, and L. A. Meyers, Serial interval of  
329 covid-19 among publicly reported confirmed cases. *medRxiv* (2020).
- 330 17. New York Times github source, *US coronavirus data* (2020);  
331 <https://raw.githubusercontent.com/nytimes/covid-19-data/master/us-counties.csv>.
- 332 18. NOAA Global Surface Summary of the Day, *Weather data for 2020* (2020);  
333 <https://data.nodc.noaa.gov/cgi-bin/iso?id=gov.noaa.ncdc:C00516>.
- 334 19. Kaiser Family Foundation, *State Data and Policy Actions to Address Coronavirus*  
335 (2020); [https://www.kff.org/health-costs/issue-brief/state-data-and-policy-actions-to-](https://www.kff.org/health-costs/issue-brief/state-data-and-policy-actions-to-address-coronavirus/)  
336 [address-coronavirus/](https://www.kff.org/health-costs/issue-brief/state-data-and-policy-actions-to-address-coronavirus/).
- 337 20. J. H. Jones, Notes on R0. *California: Department of Anthropological Sciences* 323  
338 (2007).
- 339 21. D. L. Smith, F. E. McKenzie, R. W. Snow, S. I. Hay, Revisiting the basic reproductive  
340 number for malaria and its implications for malaria control. *PLoS biology* **5**(3) (2007).
- 341 22. M. Pollicott, H. Wang, H. Weiss, Extracting the time-dependent transmission rate from  
342 infection data via solution of an inverse ODE problem. *J. Boil. Dynam.* **6**(2), 509-523  
343 (2012).

## 344 **Supplementary Materials**

345 Materials and Methods

346 Supplementary Text

347 Figures S1-S4

348 Tables S1-S3

349 References (6, 16-22)

353 **Acknowledgments**

354

355 **Author contributions:** Conceptualization: SW, DR; Data curation: SW, DR; Formal  
356 analysis: SW, DR; Methodology: SW, DR; Software: SW, DR; Visualization: SW, DR;  
357 Writing, original draft: SW, DR; Writing, reviewing and editing: SW, DR.

358

359 **Competing interests:** The authors declare no competing interests.

360

361 **Data and materials availability:** US coronavirus data are publically available from the New  
362 York Times GitHub source: [https://raw.githubusercontent.com/nytimes/covid-19-](https://raw.githubusercontent.com/nytimes/covid-19-data/master/us-counties.csv)  
363 [data/master/us-counties.csv](https://raw.githubusercontent.com/nytimes/covid-19-data/master/us-counties.csv); Weather data are publicly available from NOAA Global  
364 Surface Summary of the Day (GSOD): [https://data.nodc.noaa.gov/cgi-](https://data.nodc.noaa.gov/cgi-bin/iso?id=gov.noaa.ncdc:C00516)  
365 [bin/iso?id=gov.noaa.ncdc:C00516](https://data.nodc.noaa.gov/cgi-bin/iso?id=gov.noaa.ncdc:C00516); State and policy data to address coronavirus are  
366 publically available from Kaiser Family Foundation: [https://www.kff.org/health-](https://www.kff.org/health-costs/issue-brief/state-data-and-policy-actions-to-address-coronavirus/)  
367 [costs/issue-brief/state-data-and-policy-actions-to-address-coronavirus/](https://www.kff.org/health-costs/issue-brief/state-data-and-policy-actions-to-address-coronavirus/)

368

369 **Figures and Tables**

370 (see next page)

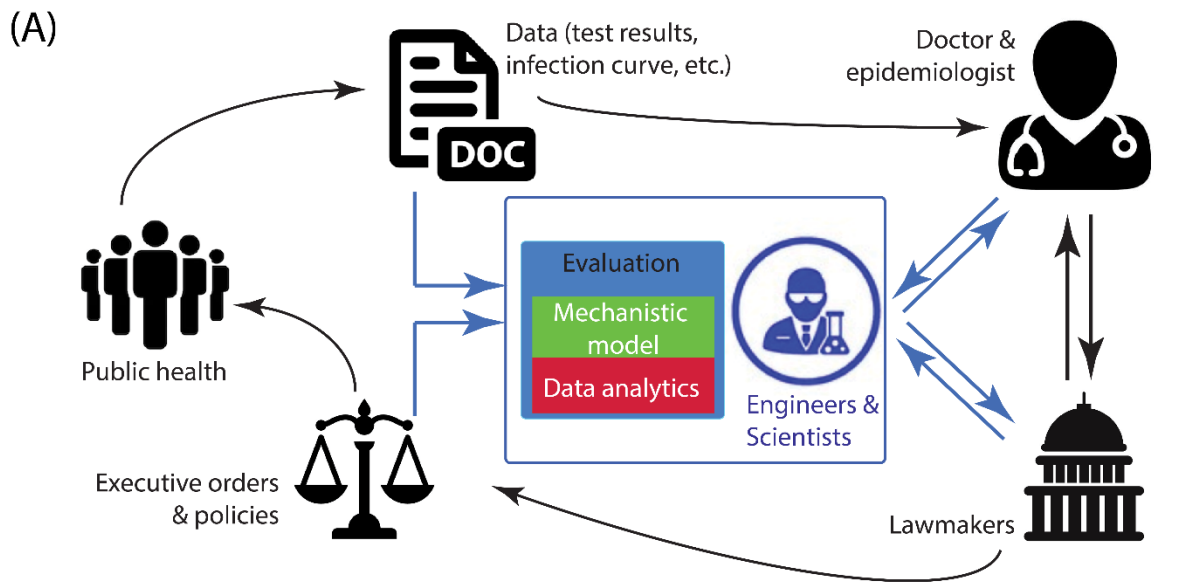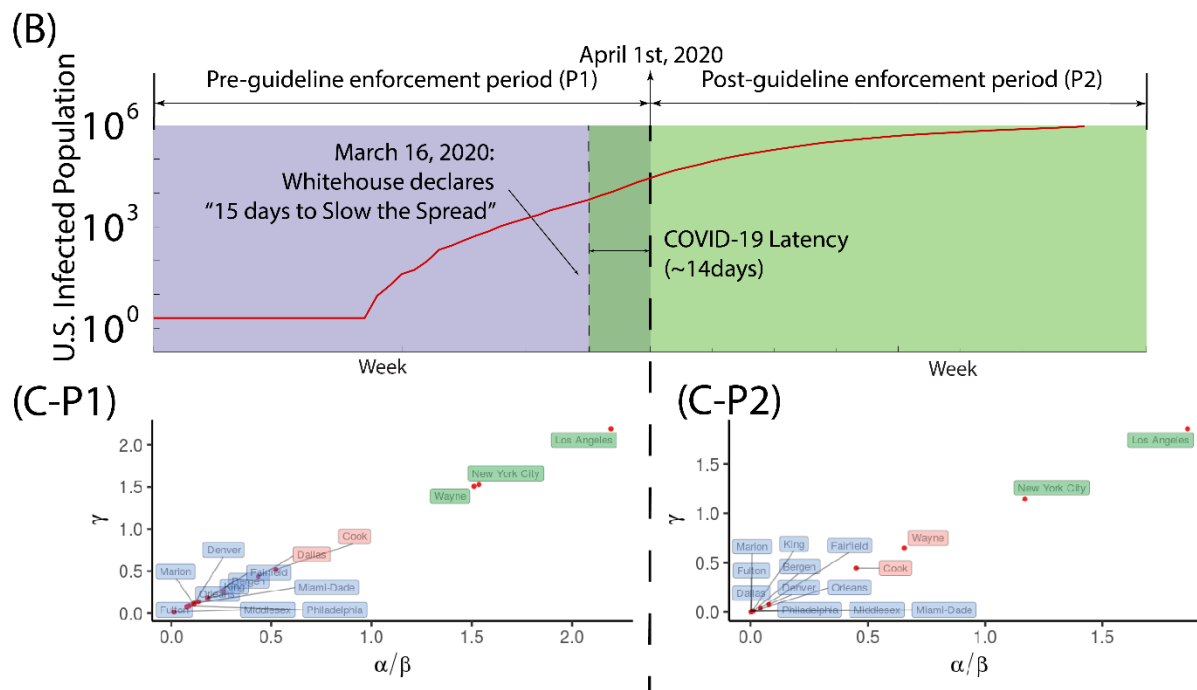

**Fig. 1. Parametric study on coronavirus infection in United States.** (A) By incorporating both mechanistic modeling and data analysis (in blue) into the traditional workflow of the policy making (in black), a refreshed framework forms a three-way communication among expert (doctor/epidemiologist), engineers/scientists and lawmakers, thus improving the implementation of health policies against the infectious disease. (B) The timeline of total population with COVID-19 positive in conjunction with the policy of “15 Days to Slow the Spread” in the United States, in which the infection period is divided into the pre-guideline enforcement period (P1) and the post-guideline enforcement period (P2). (C) The phase space in terms of  $\alpha/\beta$  and  $\gamma$  is plotted for the leading infected counties in first fifteen states: P1 duration and P2 duration. The phase space is segregated as three regions:

381 ‘severe’ (labeled as green;  $\alpha / \beta \in (1.0, \infty)$ ), ‘moderate’ (labeled as red;  $\alpha / \beta \in [0.4, 1.0]$ ), and ‘mild’  
 382 (labeled as blue;  $\alpha / \beta \in (0, 0.4)$ ).

383

384

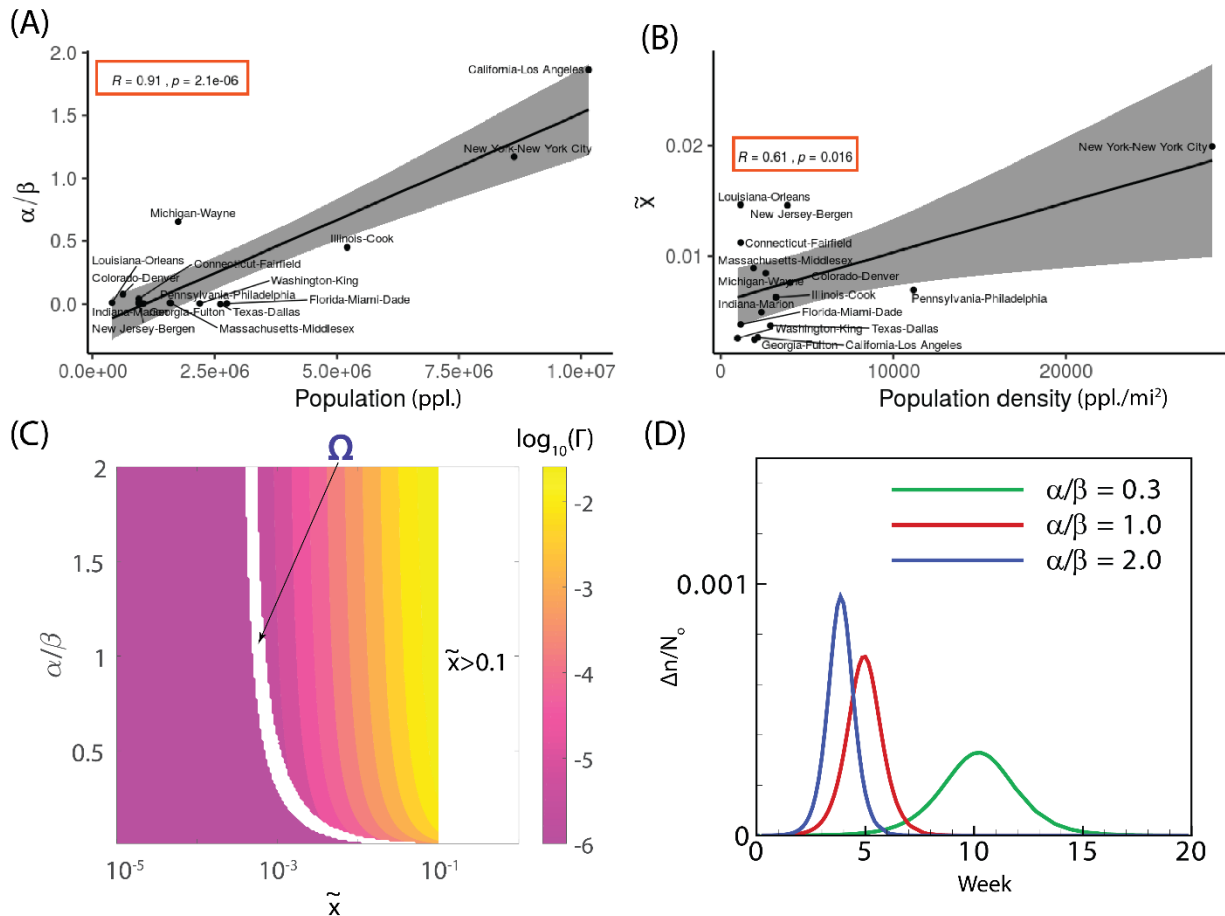

385

386 **Fig. 2. Relationship between county population and  $\alpha / \beta$  &  $\tilde{x}$ .** (A and B) The statistical correlations  
 387 ( $R$ : Pearson correlation coefficient) are displayed for (A) virulence ( $\alpha / \beta$ ) vs. the corresponding county  
 388 population and (B) the projected infection fraction ( $\tilde{x}$ ) vs. the corresponding county population density  
 389 (sample number is 15). (C) A phase diagram in terms of  $\alpha / \beta$  and  $\tilde{x}$  for the peak infection rate  $\Gamma$ ; domain  
 390 ‘ $\Omega$ ’ represents the region in which the peak infection is not reached and Region  $\{|\tilde{x}| > 0.1\}$  indicates the  
 391 unlikely space where total infection exceeds 10% of the total population in the domain considered. (D) The  
 392 effect of dimensionless parameter  $\alpha / \beta$  on peak infection is studied with  $|\tilde{x}| = 0.01$ . For (C) and (D), the  
 393 simulations are conducted for a duration of 1 year (365 days) with  $T_{\text{inf}} = 40$  minutes.

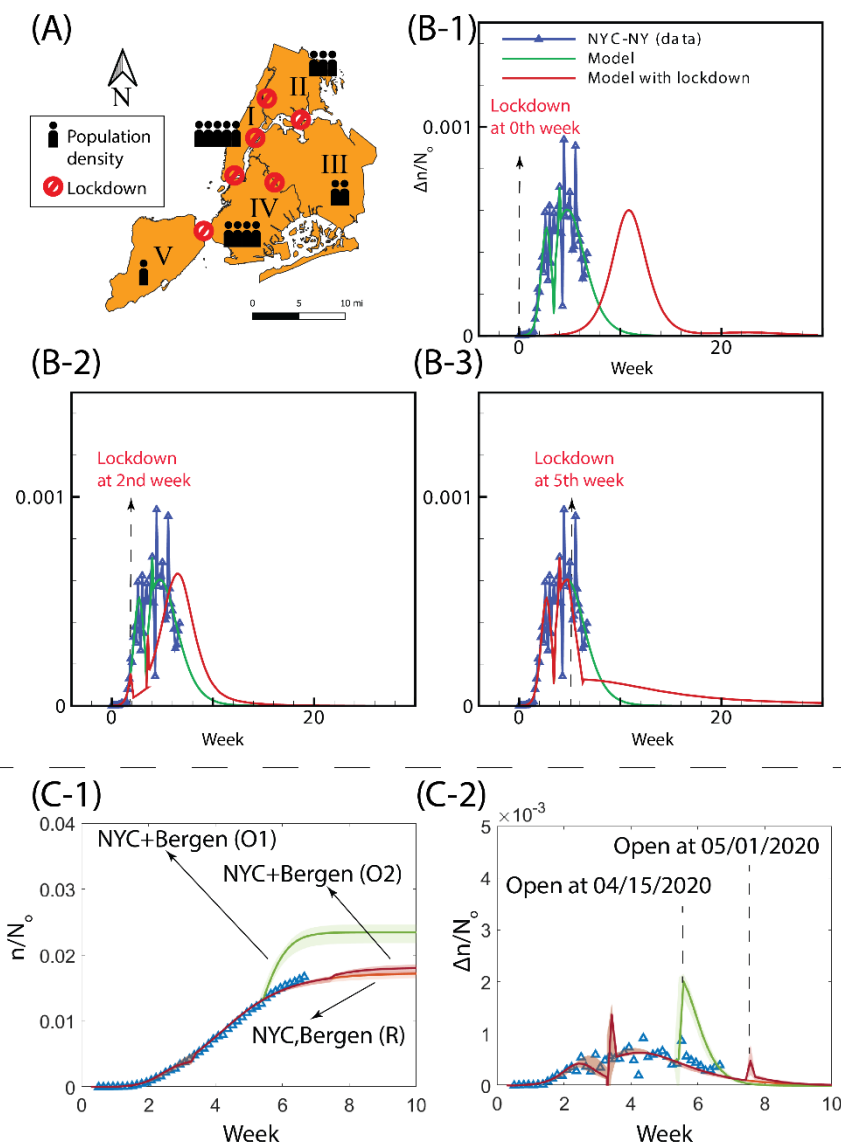

394

395 **Fig. 3. Effect of lockdown and reopening economy on the spread of infection in New York City.** (A)  
 396 The strict policy of lockdown is assumed at the borders of five boroughs - Manhattan(I), the Bronx (II),  
 397 Queens (III), Brooklyn (IV) and Staten Island (V) within New York City. (B) The date of initiating lockdown  
 398 affects daily positive cases  $\Delta n$  in New York City scaled by total population density  $N_0$ , where the start of  
 399 policy enforcement is set at different initiation points: zeroth week (B-1), 2nd week (B-2), and 5th week (B-  
 400 2), respectively. (C) Modeling of infected population (C-1) and increment (C-2) by considering different  
 401 opening periods for New York City and Bergen county (inner New Jersey circle): ‘NYC+Bergen (O1)’  
 402 indicates the reopening economy at 5.5th week; ‘NYC+Bergen (O2)’ indicates the reopening economy at  
 403 7.5th week; ‘NYC, Bergen (R)’ indicates the economy remains closed. In (C),  $N_0$  represents the averaged  
 404 resident population density of both New York City and Bergen (New Jersey); Symbols ‘ $\Delta$ ’ are the data of  
 405 the infected population within New York City and Bergen (New Jersey); Plots with shaded area are the  
 406 modeling results where solid lines represent the median of the prediction and the shaded area indicates the  
 407 uncertainty. The zeroth week is set at the moment when the total number of infections at the New York City  
 408 is ten.  
 409

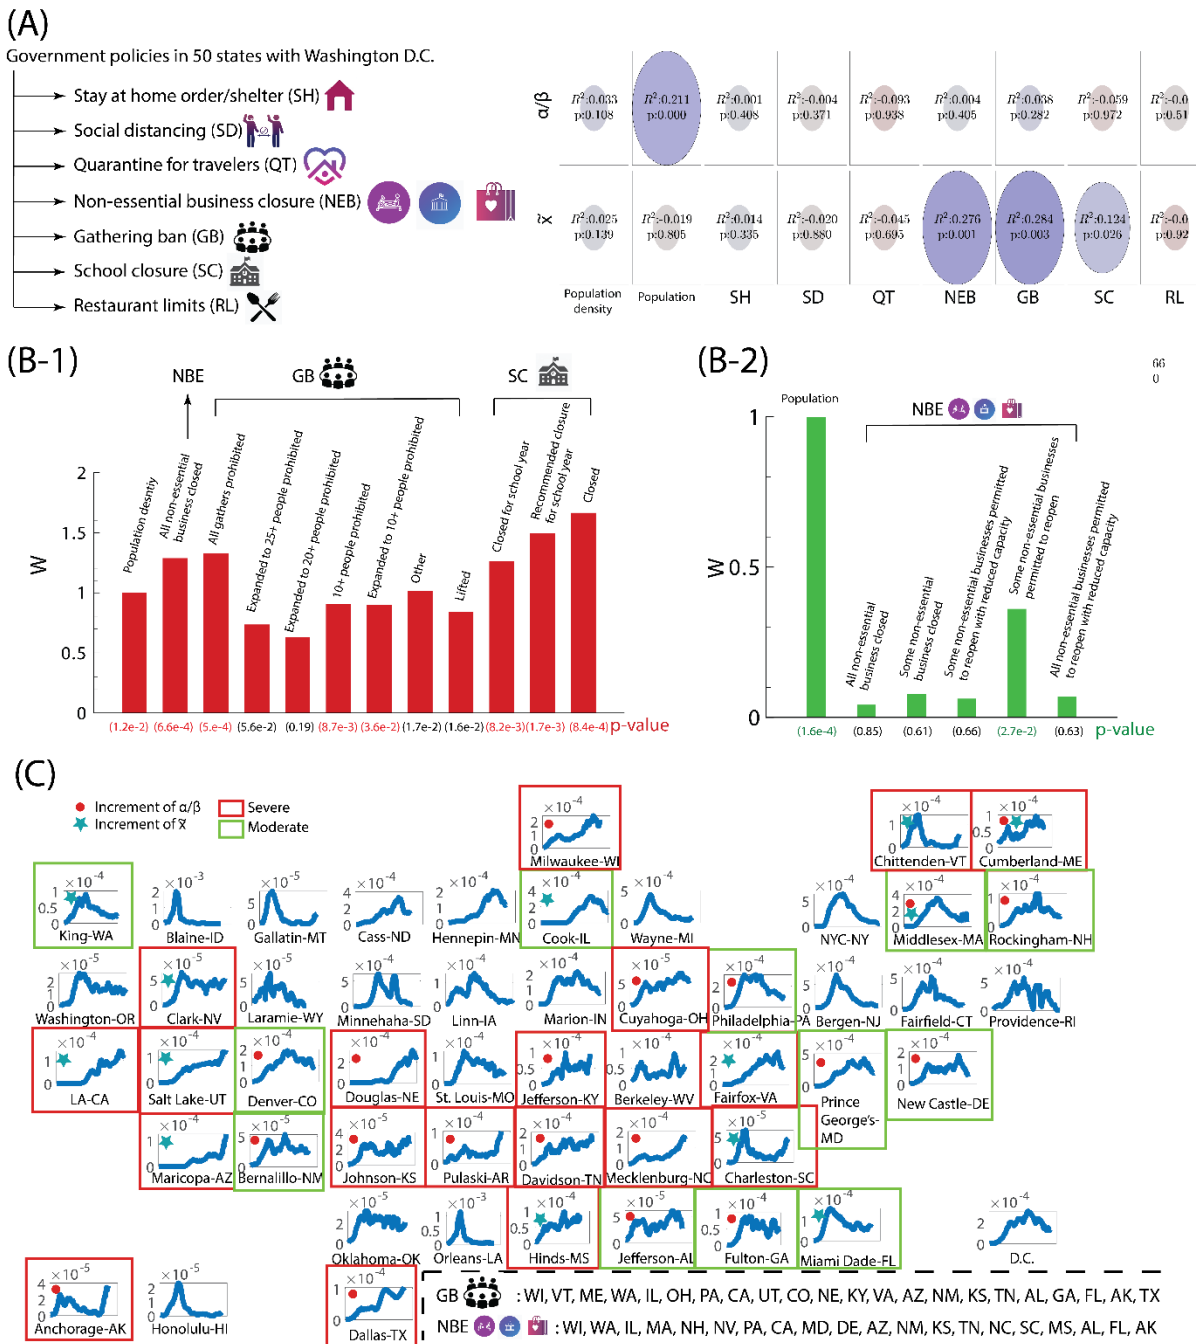

**Fig. 4. Evaluation of policies on COVID-19 transmissibility.** (A) The relevance and significance of individual policy and population dynamics (population and population density) on model parameters  $\alpha/\beta$  and  $\tilde{x}$ , characterized by adjusted  $R$ -square and p-values, respectively. In the diagram, the color of the ellipse represents the value of adjusted  $R^2$  while the size of ellipse accounts for p-value. (B) The regression analysis of government policies and local population dynamics against (B-1) the projected eventual infection fraction  $\tilde{x}$  and (B-2) virulence  $\alpha/\beta$ . The extent of influence from individual factor is reflected by the corresponding weight ( $W$ ). In (B), the weights are normalized by the first factor. (C) Upon economy opening, the modification of polices impacts the trend of infection curve. We can identify the states with the surge of positive cases by the prediction of  $\alpha/\beta$  and  $\tilde{x}$  using machine learning: the blue plots represent the daily increment  $\Delta n$  (7-day running averaged) normalized by the total population density  $N_o$  in the leading county of all fifty states (including D.C.) For all ‘emerging’ counties in each state, a red filled circle is recognized by the elevation of  $\alpha/\beta$  from the prediction of the machine learning; A green filled star represents the

423 increase of  $\tilde{x}$ ; the red square implies the severe situation based on the plateau/ upward-trending daily growth  
424 and the yellow square indicates the moderate scenario based on the downward-trending daily growth curve.  
425  
426

427 **Table 1. Emerging indicators from pathogen system**

| Notation                                               | Variables                                                                                                                                                                                                                       |
|--------------------------------------------------------|---------------------------------------------------------------------------------------------------------------------------------------------------------------------------------------------------------------------------------|
| $\alpha \equiv \frac{k_v N_o}{k V_o^2}$                | Fractional rate of viral growth during the (average) infection time with $V_o$ viral population;<br>$k_v$ is the rate constant for production of virus from the infected;<br>$k$ is the rate constant for transfer of infection |
| $\beta \equiv \frac{k'_v}{k V_o}$                      | Viral death rate during (average infection time);<br>$k'_v$ is the rate of death of virus                                                                                                                                       |
| $\gamma \equiv \frac{k_r}{k V_o}$                      | Removed rate of infected patients relative to infection rate with $V_o$ viral population;<br>$k_r$ is the rate of removed population (either by death or recovery)                                                              |
| $\frac{\alpha}{\beta} \equiv \frac{k_v N_o}{k'_v V_o}$ | Ratio of viral growth rate to its death rate                                                                                                                                                                                    |

428
